# Supplementary material for: Structure-Function of the High Affinity Substrate Binding Site (S1) of Human Norepinephrine Transporter
Source: PubMed Central journal article supplement (PMC7066499; doi:10.3389/fphar.2020.00217), 2020-03-05

**Supplementary Figure 1.** Alignment of hNET homology models based on dDAT (PDB ID 4M48) in blue, dDAT (PDB ID 4XPA) in green and hSERT (PDB ID 5I6X) in yellow.

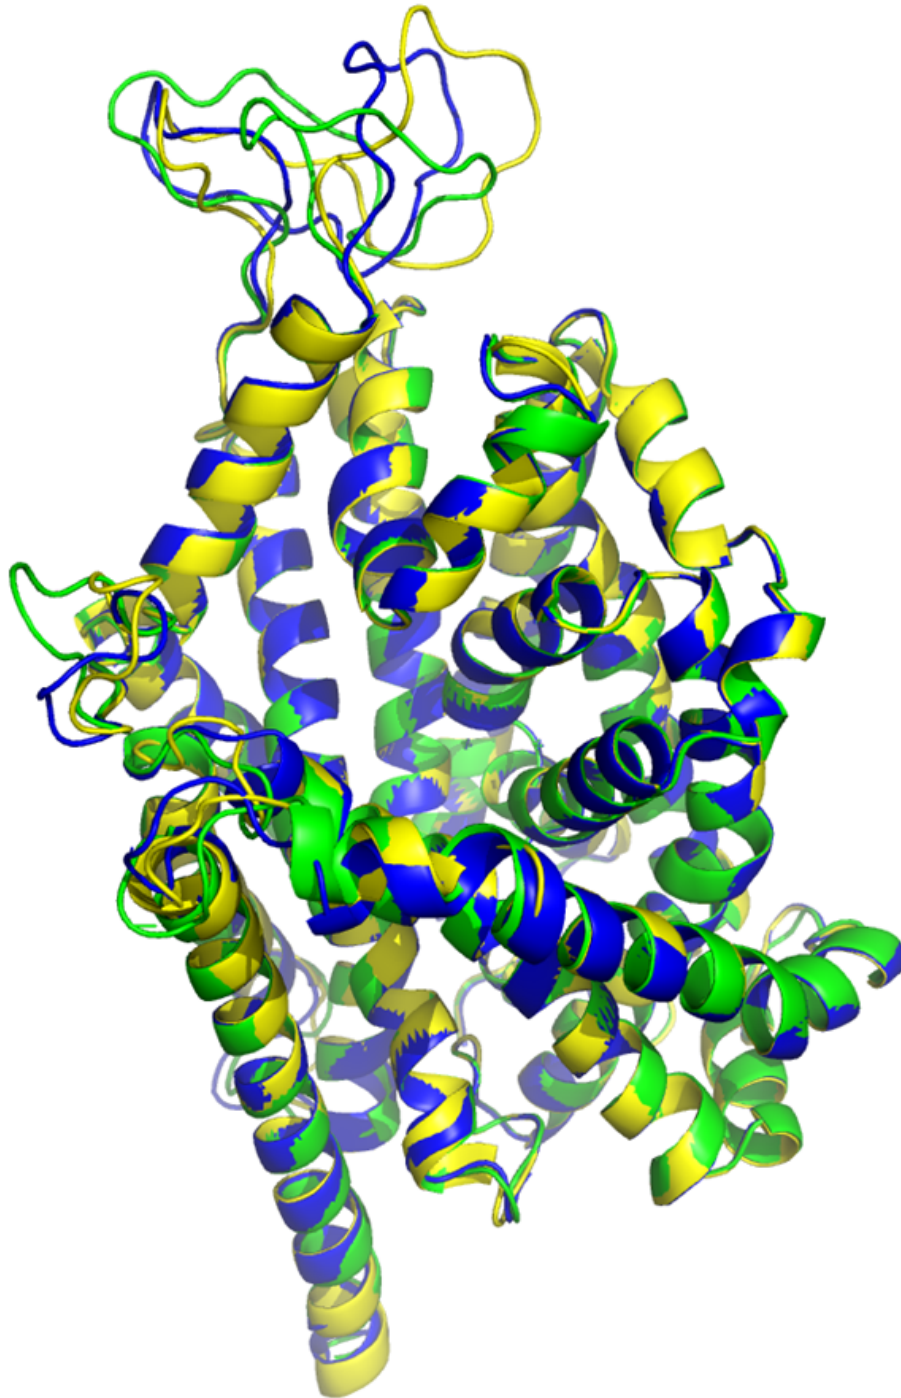

Supplement: Image_1.pdf [file Image_1.pdf]
