# Supplementary material for: Structure-Function of the High Affinity Substrate Binding Site (S1) of Human Norepinephrine Transporter
Source: PubMed Central journal article supplement (PMC7066499; doi:10.3389/fphar.2020.00217), 2020-03-05
Supplement: Table_1.pdf [file Table_1.pdf]

**Supplementary Table 1.** hNET SNP effects on pharmacology and pathology.

| <b>Mutation</b> | <b>Pharmacological effect</b>                                                                                                                                                                | <b>Pathology</b>                                               | <b>Reference</b>                                                |
|-----------------|----------------------------------------------------------------------------------------------------------------------------------------------------------------------------------------------|----------------------------------------------------------------|-----------------------------------------------------------------|
| V69I            | No effect in $K_m$ and $V_{max}$ for NE transport; no change in desipramine potency                                                                                                          |                                                                | (Runkel, Brüss et al. 2000)                                     |
| T99I            | No effect in $K_m$ and $V_{max}$ for NE transport; no change in desipramine potency                                                                                                          |                                                                | (Runkel, Brüss et al. 2000)                                     |
| R121Q           | Greater impact on NE transport than DA transport                                                                                                                                             | Long QT syndrome (disorder of the heart's electrical activity) | (Hahn, Mazei-Robison et al. 2005, Hahn and Blakely 2007)        |
| V244I           | Little effect on hNET expression levels or transport of NE and DA.                                                                                                                           |                                                                | (Hahn, Mazei-Robison et al. 2005)                               |
| V245I           | No effect in $K_m$ and $V_{max}$ for NE transport; no change in desipramine potency                                                                                                          | Attention deficit hyperactivity disorder (ADHD)                | (Runkel, Brüss et al. 2000)                                     |
| N292T           | Some loss of NE and DA transport and expression of functional transporter                                                                                                                    |                                                                | (Hahn, Mazei-Robison et al. 2005)                               |
| V356L           | Little effect on hNET expression levels and transport of NE and DA.                                                                                                                          |                                                                | (Hahn, Mazei-Robison et al. 2005)                               |
| V356S           | Increase in DA uptake but decrease in affinity for nortriptyline and desipramine.                                                                                                            |                                                                | (Hahn, Mazei-Robison et al. 2005)                               |
| A369P           | Complete loss of transport of NE and DA; retained intracellularly.                                                                                                                           |                                                                | (Hahn, Mazei-Robison et al. 2005)                               |
| N375S           | Little effect on hNET expression levels and transport of NE and DA.                                                                                                                          |                                                                | (Hahn, Mazei-Robison et al. 2005)                               |
| N375P           | 2-fold increase in NE and DA uptake.                                                                                                                                                         |                                                                | (Hahn, Mazei-Robison et al. 2005)                               |
| V449I           | No effect in $K_m$ and $V_{max}$ for NE transport; no change in desipramine potency                                                                                                          |                                                                | (Runkel, Brüss et al. 2000)                                     |
| A457P           | 5-fold higher affinity for cocaine; two-fold lower affinity for nisoxetine, and unchanged affinity for desipramine. 40% expression of the wild-type hNET; 50-fold higher $K_m$ for NE        |                                                                | (Hahn, Robertson et al. 2003)                                   |
| K463R           | Little effect on hNET expression levels and transport of NE and DA                                                                                                                           |                                                                | (Hahn, Mazei-Robison et al. 2005)                               |
| G478S           | 4-fold increase in $K_m$ for NE uptake but no change in $V_{max}$ ; no change in desipramine potency                                                                                         |                                                                | (Runkel, Brüss et al. 2000)                                     |
| F528C           | Increase in ratio of NE to DA transport and $V_{max}$ to $K_m$ for NE transport; no change in $K_i$ values for NE competition of NX binding or in DA uptake; increase in translocation of NE | Major depression                                               | (Hahn, Mazei-Robison et al. 2005, Haenisch, Linsel et al. 2009) |
| Y548H           | 20% loss of NE and DA transport and expression of functional transporter.                                                                                                                    |                                                                | (Hahn, Mazei-Robison et al. 2005)                               |
| I549T           | Decrease in protein expression but no change in NE and DA transport.                                                                                                                         |                                                                | (Hahn, Mazei-Robison et al. 2005)                               |

Haenisch, B., K. Linsel, M. Bruss, R. Gilsbach, P. Propping, M. M. Nothen, M. Rietschel, R. Fimmers, W. Maier, A. Zobel, S. Hofels, V. Guttenthaler, M. Gothert and H. Bonisch (2009). Association of major depression with rare functional variants in norepinephrine transporter and serotonin<sub>1A</sub> receptor genes. *American Journal of Med Genet B* **150B**: 1013-1016.

- Hahn, M. K. and R. D. Blakely (2007). The functional impact of SLC6 transporter genetic variation. *Annual Review of Pharmacology and Toxicology* **47**: 401-441.
- Hahn, M. K., M. S. Mazei-Robison and R. D. Blakely (2005). Single nucleotide polymorphisms in the human norepinephrine transporter gene affect expression, trafficking, antidepressant interaction, and protein kinase C regulation. *Molecular Pharmacology* **68**(2): 457-466.
- Hahn, M. K., M. S. Mazei-Robison and R. D. Blakely (2005). Single nucleotide polymorphisms in the human norepinephrine transporter gene affect expression, trafficking, antidepressant interaction, and protein kinase C regulation. *Molecular Pharmacology* **68**(2): 457-466.
- Hahn, M. K., D. Robertson and R. D. Blakely (2003). A mutation in the human norepinephrine transporter gene (SLC6A2) associated with orthostatic intolerance disrupts surface expression of mutant and wild-type transporters. *The Journal of Neuroscience* **23**(11): 4470-4478.
- Runkel, F., M. Brüss, M. M. Nöthen, G. Stöber, P. Propping and H. Bönisch (2000). Pharmacological properties of naturally occurring variants of the human norepinephrine transporter. *Pharmacogenetics and Genomics* **10**(5): 397-405.
