# Supplementary material for: Structure-Function of the High Affinity Substrate Binding Site (S1) of Human Norepinephrine Transporter
Source: PubMed Central journal article supplement (PMC7066499; doi:10.3389/fphar.2020.00217), 2020-03-05
Supplement: Table_2.pdf [file Table_2.pdf]

**Supplementary Table 2.** Functionally conserved residues across the SLC 6 family.

| <b>hNET</b> | <b>DAT</b> | <b>SERT</b> | <b>LeuT</b> |
|-------------|------------|-------------|-------------|
| A73         | A77        | A96         | A22         |
| A77         | A81        | G100        | G26         |
| N78         | N82        | N101        | N27         |
| V148        | V152       | I172        | V104        |
| N153        | N157       | N177        | N109        |
| I156        | I160       | M180        | I112        |
| G320        | G323       | G338        | S256        |
| F329        | Y332       | F347        | I265        |
| N350        | N353       | N368        | A286        |
| S420        | S423       | T427        | L356        |
| G423        | G426       | G430        | I359        |
| M424        | S427       | L431        | -----       |
